# Supplementary material for: The Effect of Probiotics Supplementation on Gut Microbiota After Helicobacter pylori Eradication: A Multicenter Randomized Controlled Trial
Source: Springer Nature journal article supplement (doi:10.1007/s40121-020-00372-9), 2020-12-03
Supplement: MOESM1 [file 18653800]

**Supplementary materials**

**Supplementary Figures and Figure Legends**


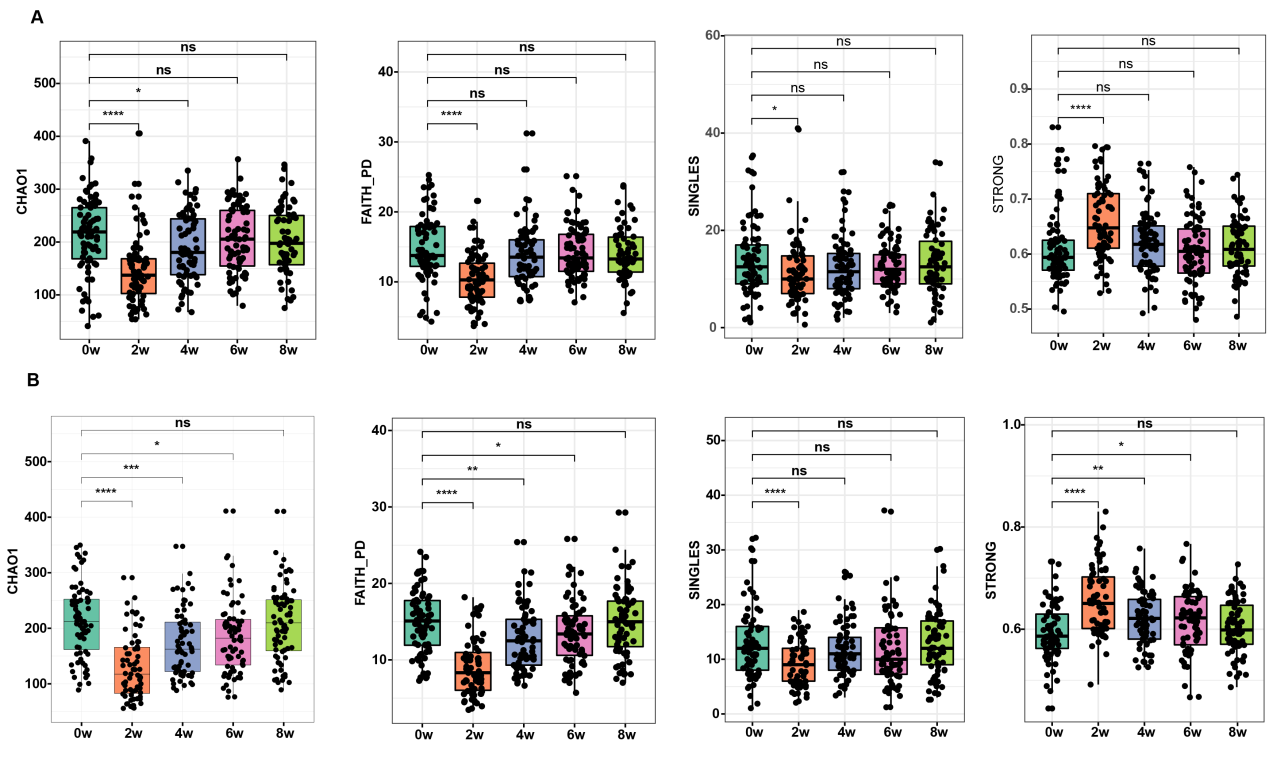


**Supplementary Figure S1. Changes in the alpha diversity at different time point in two groups.** (A) Alpha diversity in placebo group was measured by chao1 index, faith_pd, singles, and strong index before treatment, at week 2, week 4, week 6 and week 8; (B) Alpha diversity in probiotics group was measured by chao1 index, faith_pd, singles, and strong index before treatment, at week 2, week 4, week 6 and week 8.


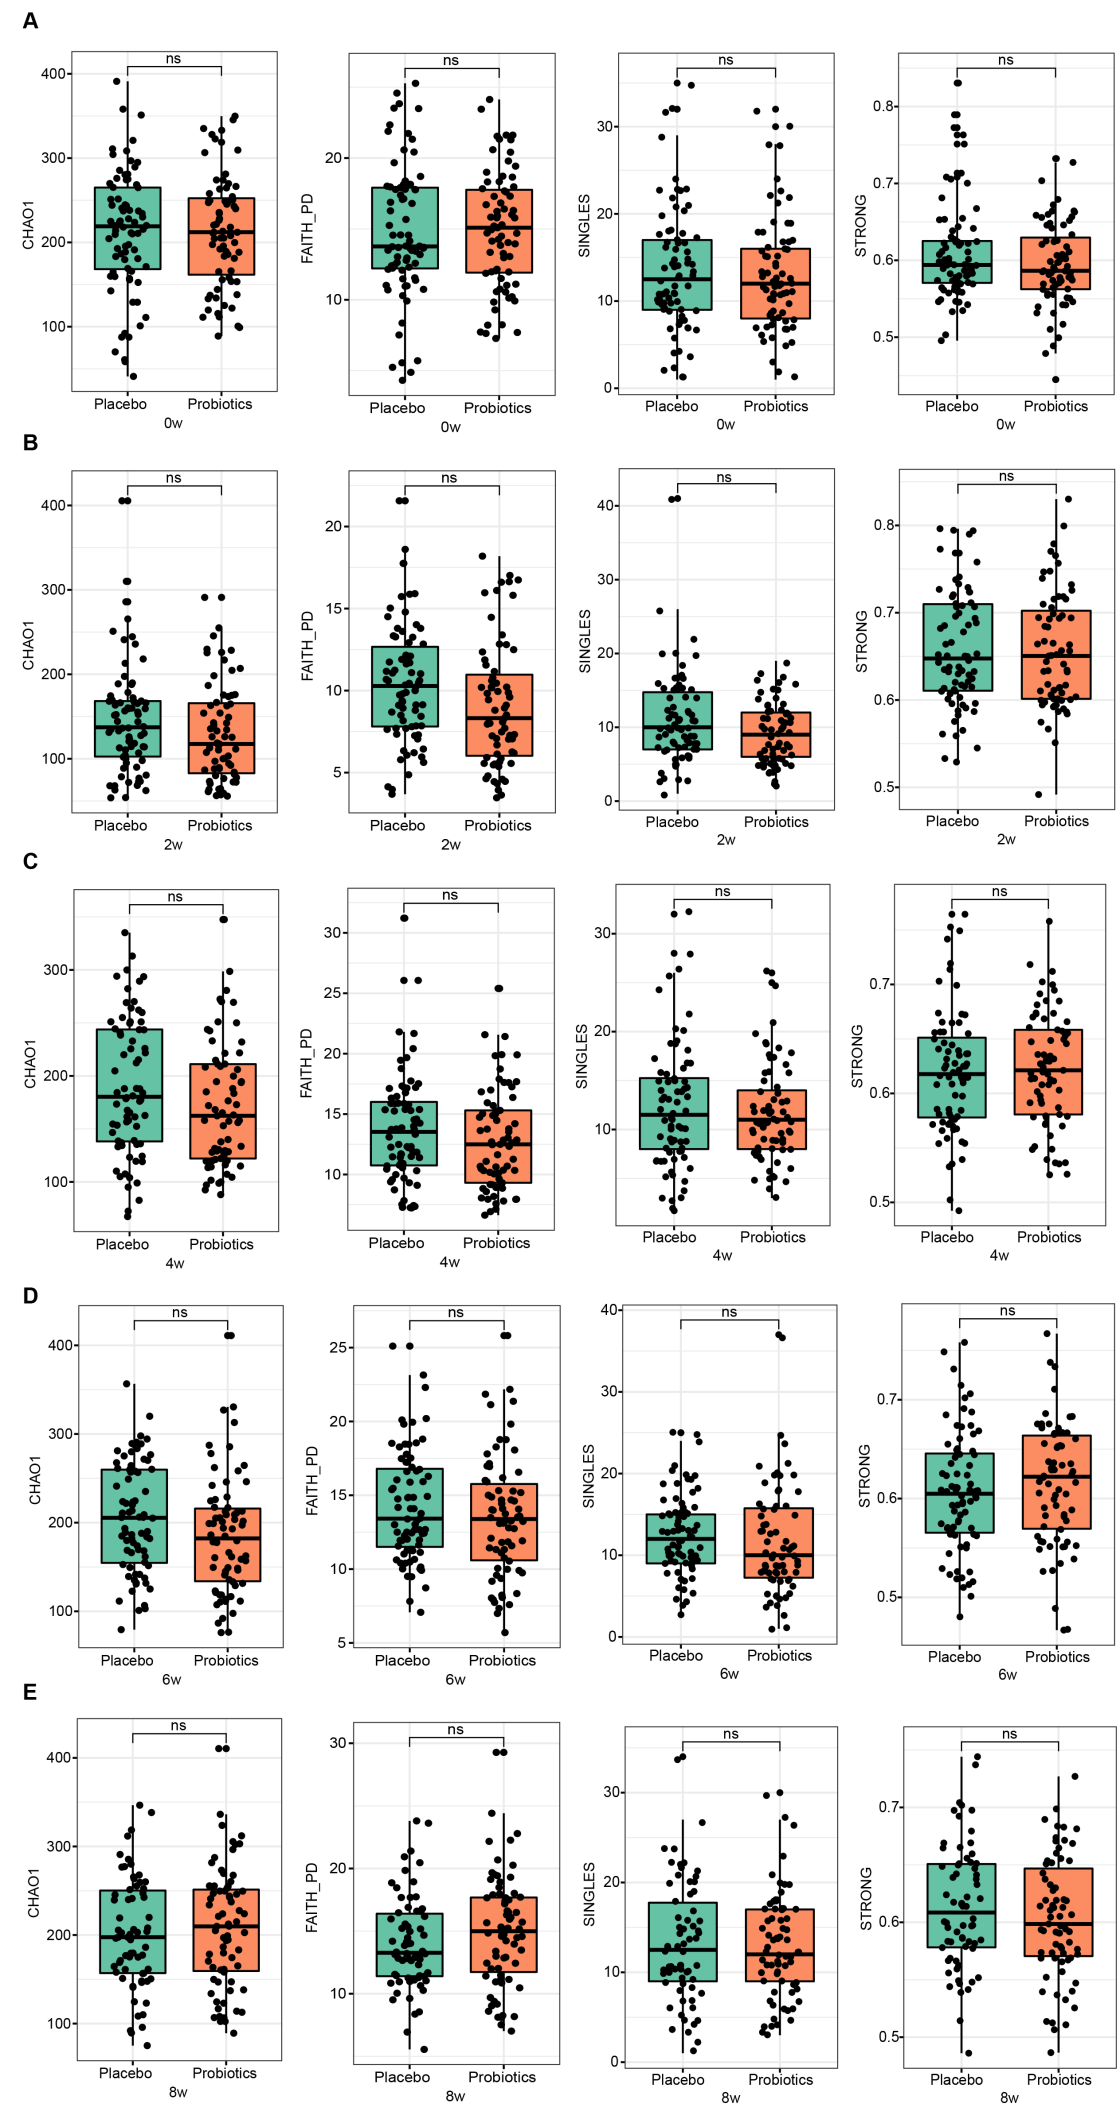


**Supplementary Figure S2. Comparison of the diversity between the two groups before and after eradication therapy.** Alpha diversity was measured by chao1 index, faith_pd, singles, and strong index.


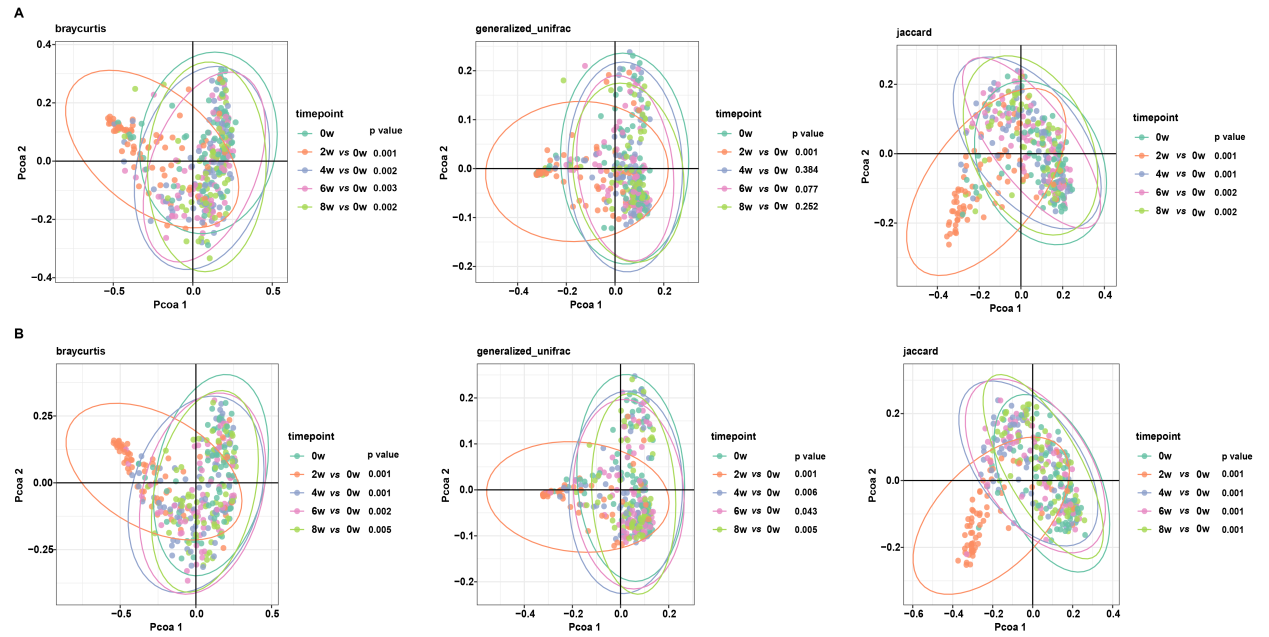


**Supplementary Figure S3. Comparison of the beta diversity between groups and each time point.** Changes in the beta diversity before treatment, at week 2, week 4, week 6 and week 8 within placebo group (A) and probiotics group (B).


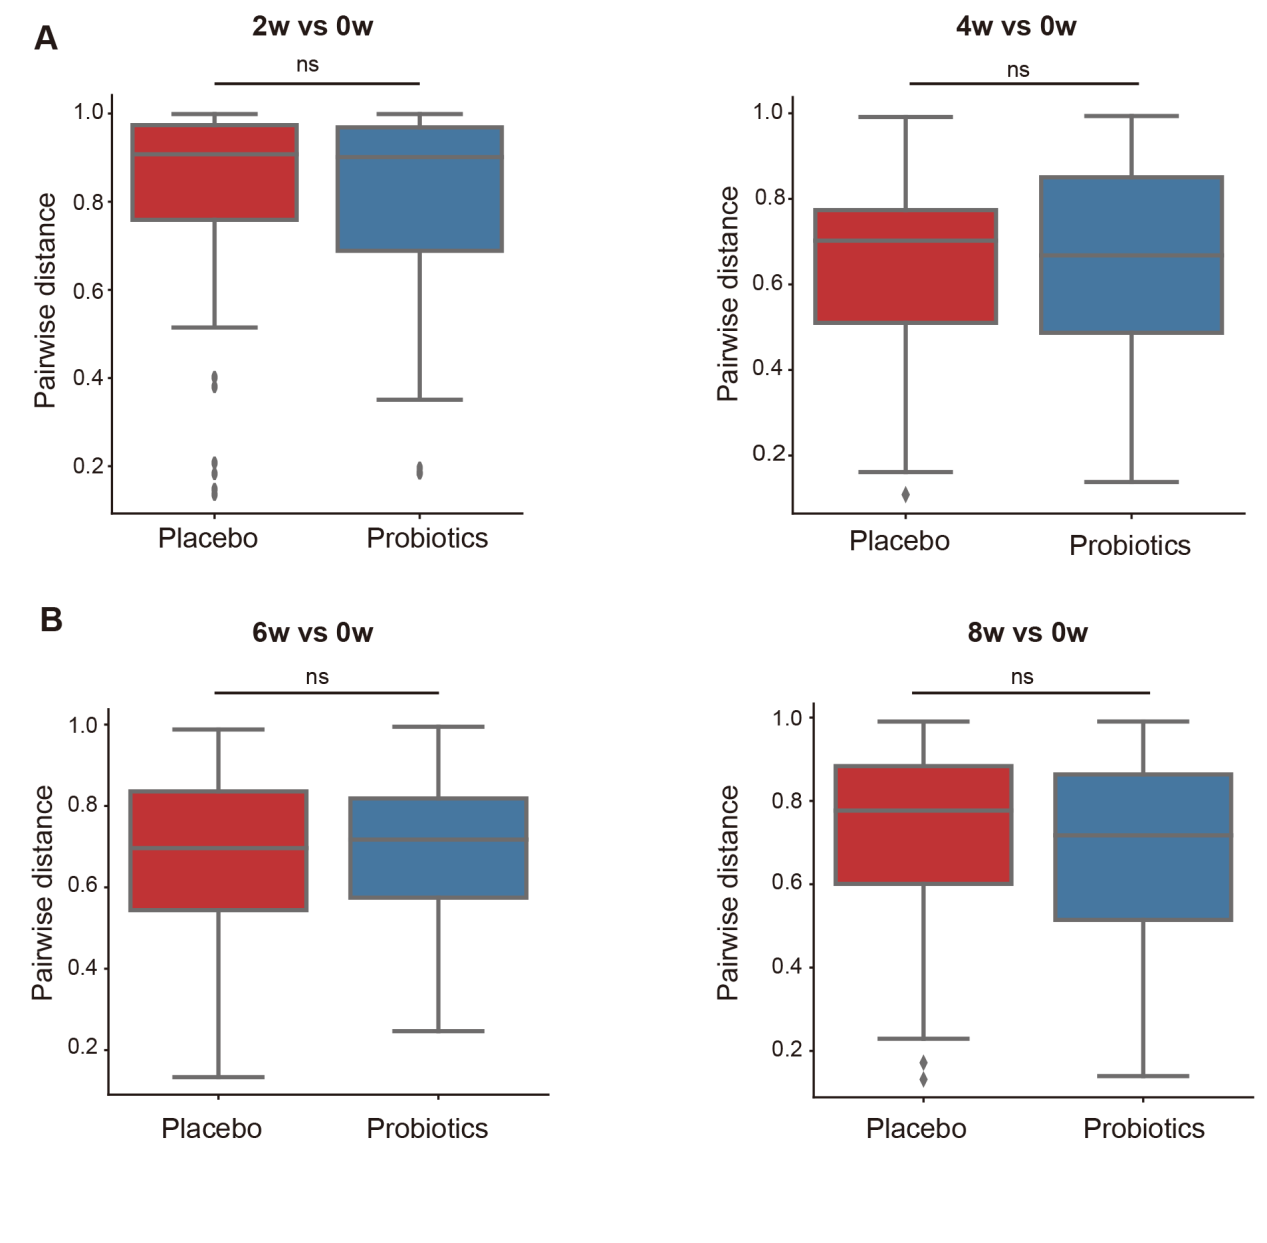


**Supplementary Figure S4. Pairwise distance between baseline and each time point after eradication, computed with beta-diversity metrics.** The Mann-Whitney test comparing placebo and probiotics is used. ns, no significance


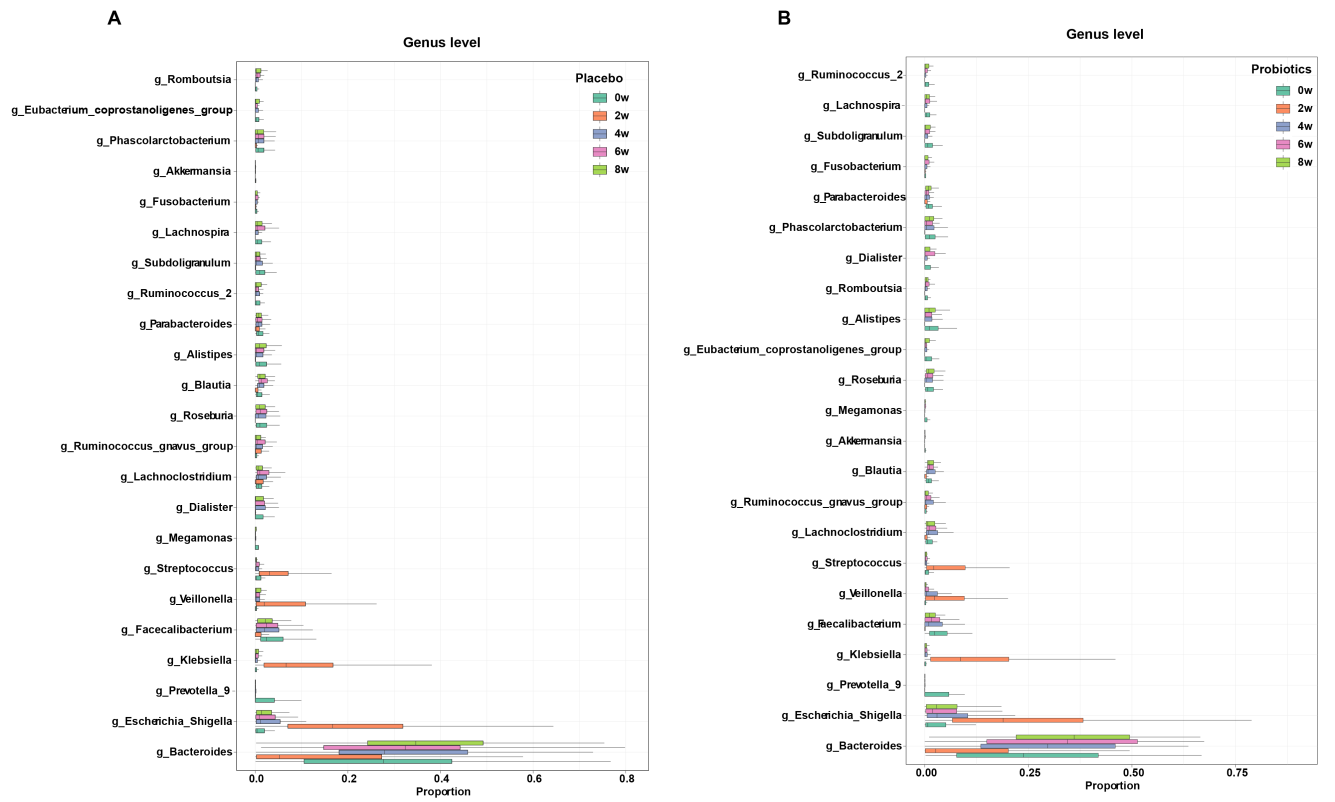


**Supplementary Figure S5. Profiles of the** **relative abundance at genus level in placebo group (A) and probiotics group (B).**


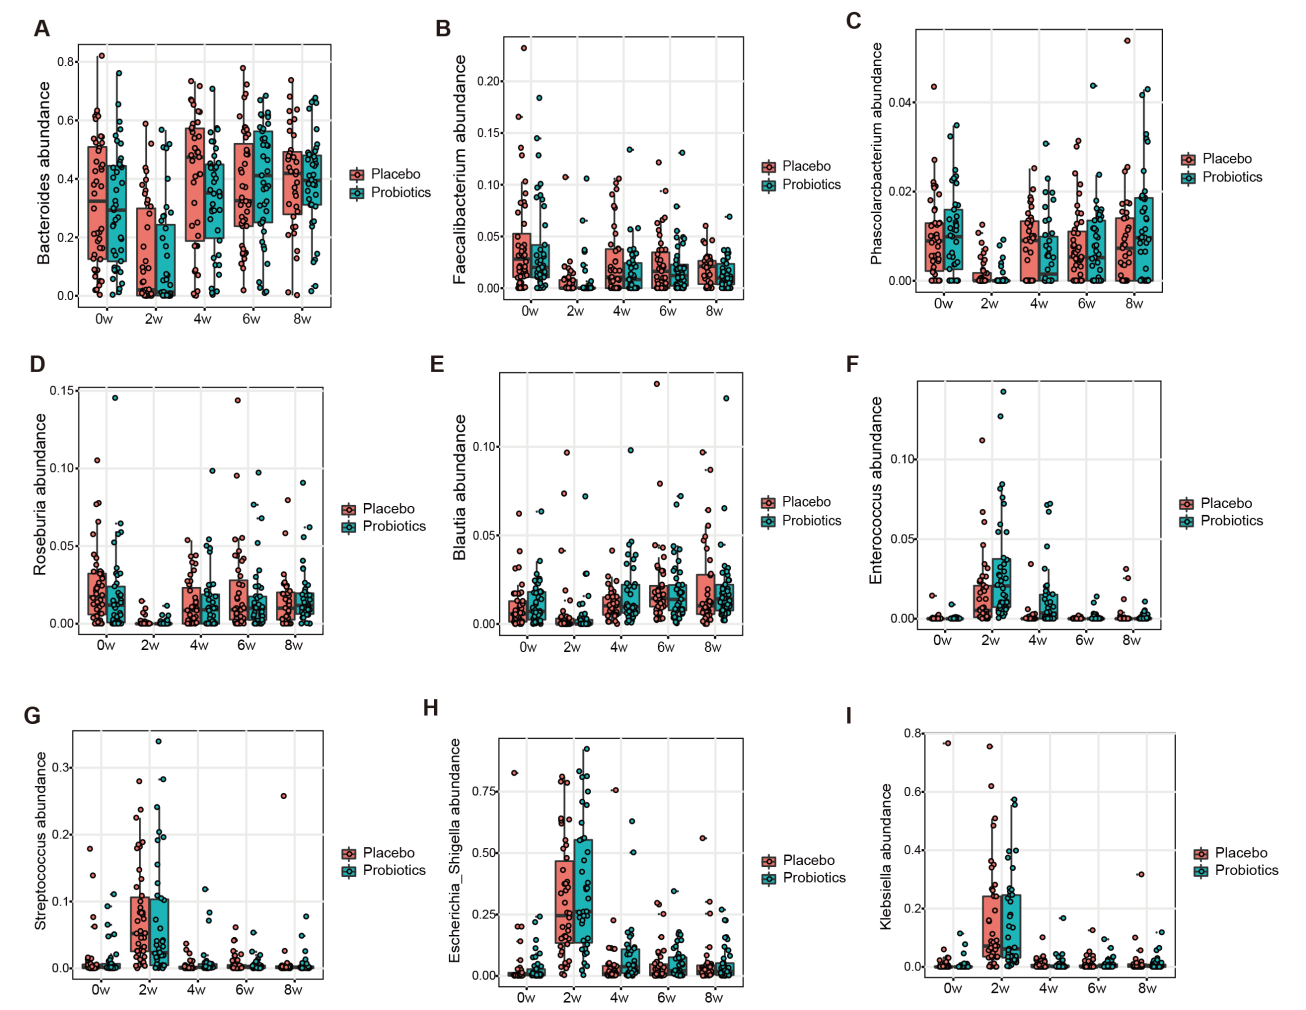


**Supplementary Figure S6. Relative abundance of taxa in placebo group and probiotics group at different time point.**


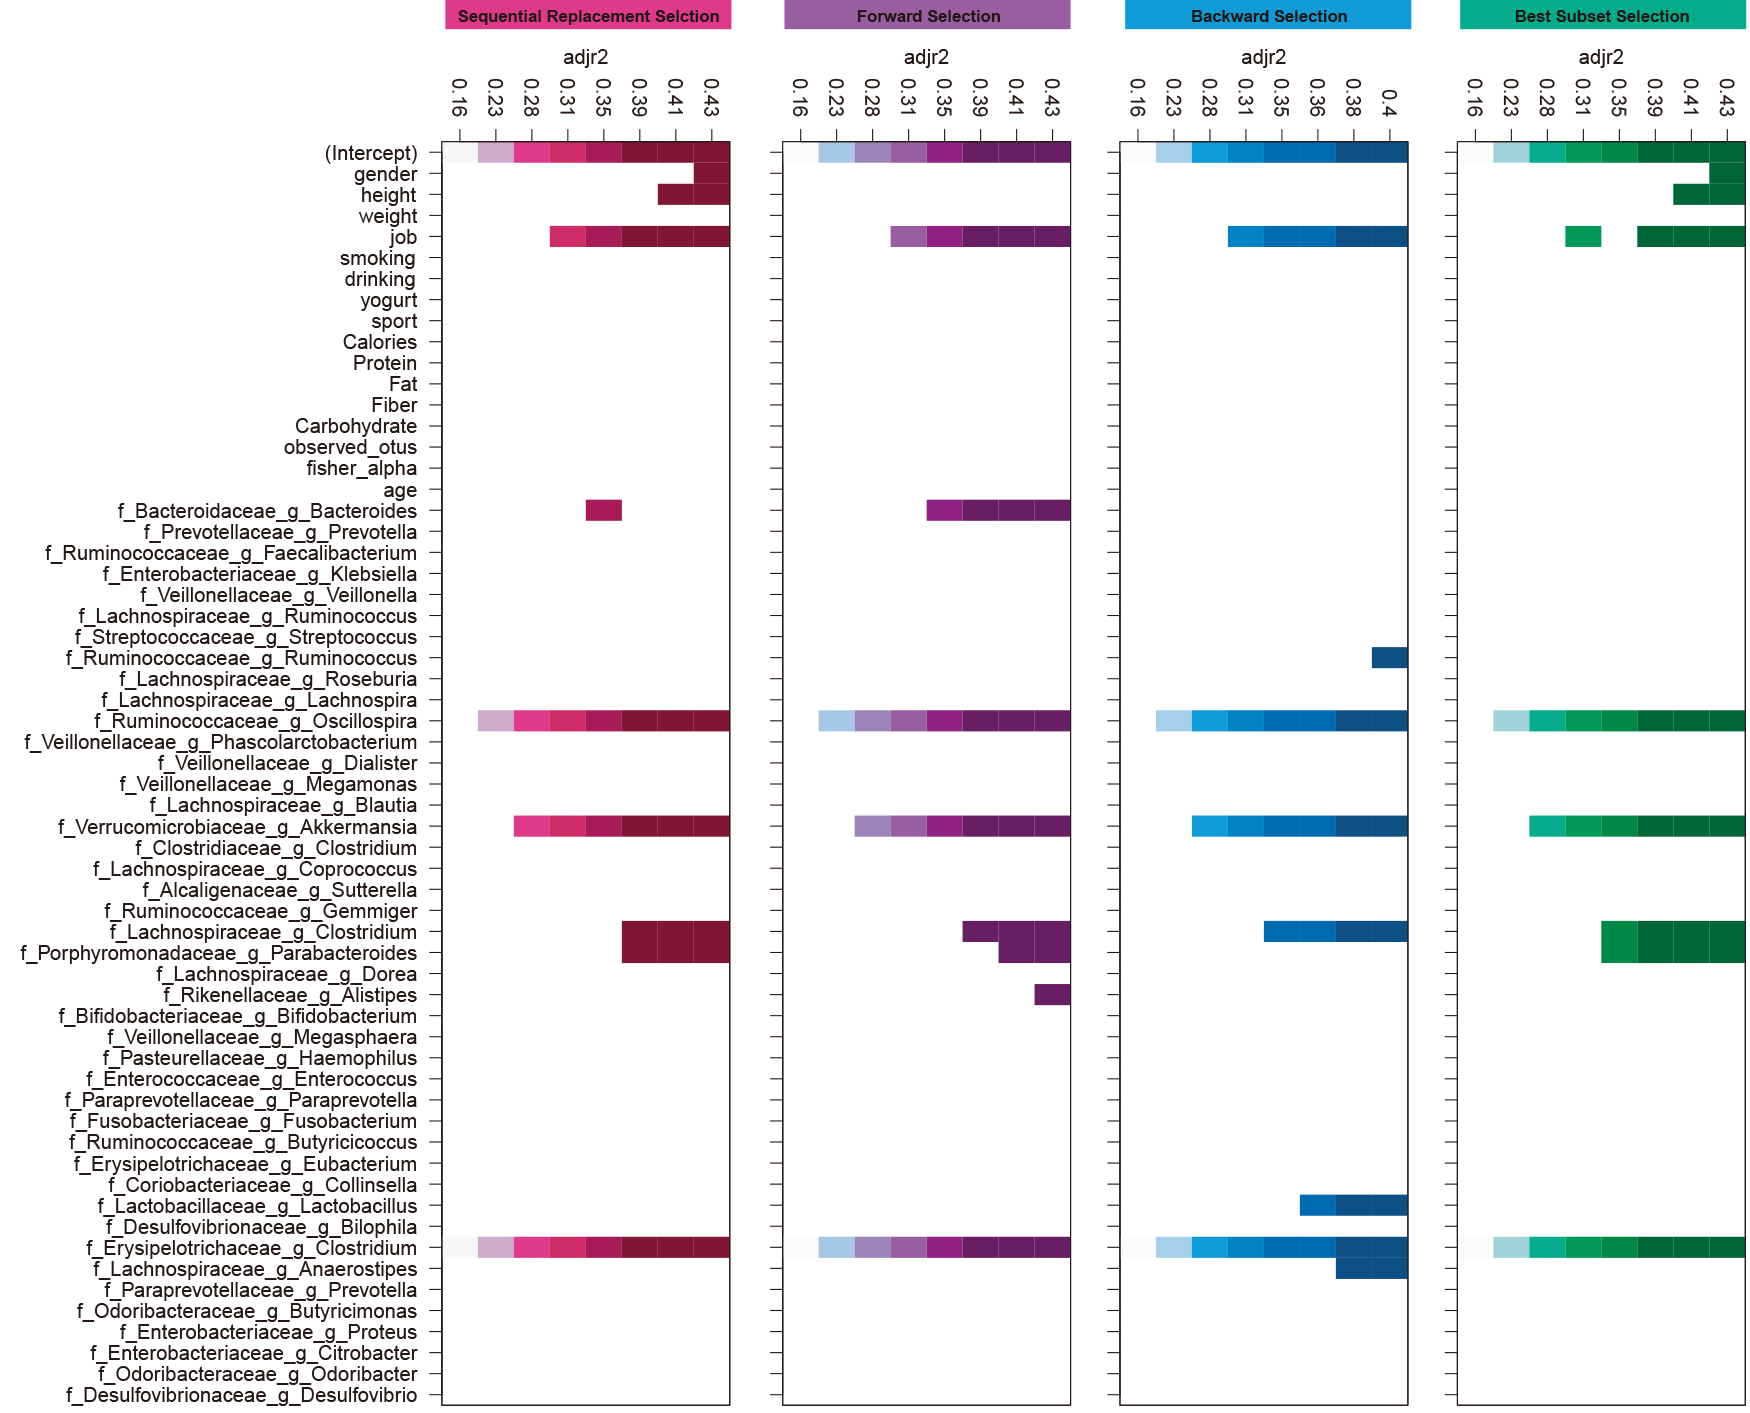


**Supplementary Figure S7. Summary of the regression models obtained with different subset selection methods.**


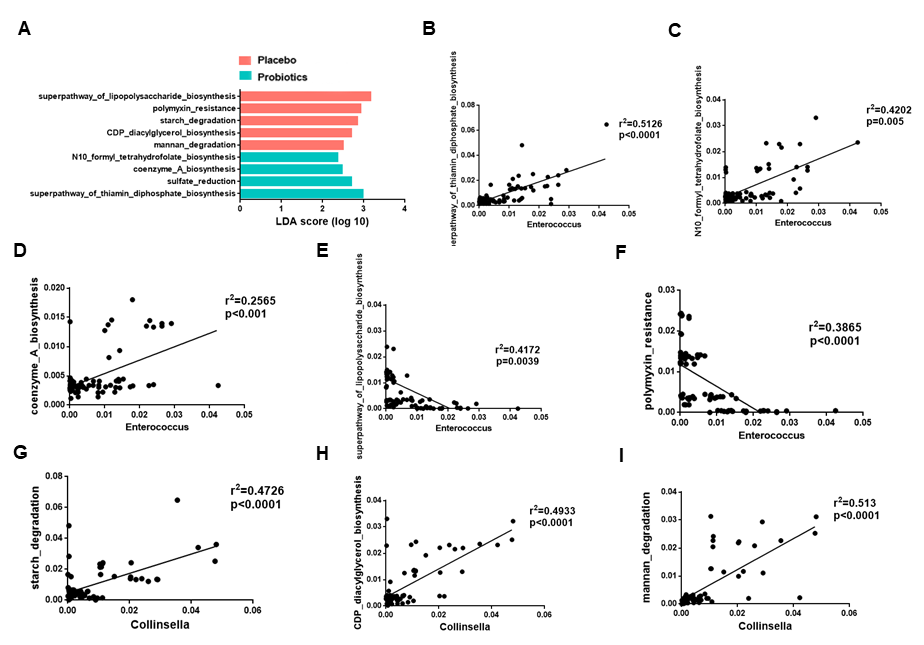


**Supplementary Figure S8. The distinct predicted metabolic pathways between the two groups.** (A) The significantly different predicted metabolic pathways between group A and group B were shown by LDA scores analyzed by LEfSe. (B-F) The association of the relative abundance of Enterococcus with various pathways. (G-I) The association of the relative abundance of Collinsella with various pathways.

**Supplementary Figure S9. Summary of the best subset selection model.**

**Supplementary Figure S10. Relative KEGG pathway abundances were compared between patients with positive eradication outcome (Y) or negative outcome (N).**

**Supplementary Tables**

**Supplementary Table S1. Clinical symptoms within the two groups.**

| Symptoms Placebo (n=74) Probiotics(n=77) *P* | | | |
| --- | --- | --- | --- |
| nausea | 8 (10.81%) | 13 (16.88%) | 0.281 |
| vomitting | 2 (2.70%) | 6 (7.79%) | 0.163 |
| diarrhea | 8 (10.81%) | 6 (7.79%) | 0.523 |
| abdominal pain | 22 (29.73%) | 16 (20.78%) | 0.205 |
| constipation | 14 (18.92%) | 13 (16.88%) | 0.744 |
| bloating | 19 (25.68%) | 23 (29.87%) | 0.565 |
| anorexia | 1 (1.35%) | 4 (5.19%) | 0.187 |
| thirst | 17 (22.97%) | 21 (27.27%) | 0.543 |

Data are presented as n (%).

**Supplementary Table S2. Food frequency questionnaire means of daily macronutrient consumption at each time point.**

| Components Placebo (n=74) Probiotics (n=77)  *P* | | | |
| --- | --- | --- | --- |
| Calories (kcal) |  |  |  |
| 0 w | 820.06±399.99 | 925.2±1074.26 | 0.662 |
| 2 w | 834.01±392.67 | 860.41±363.59 | 0.445 |
| 4 w | 791.93±314.17 | 860.85±359.4 | 0.358 |
| 6 w | 872.64±373.87 | 909.13±429.95 | 0.883 |
| 8 w | 890.66±468.76 | 950.26±451.82 | 0.401 |
| Protein (g) |  |  |  |
| 0 w | 62.82±79.33 | 68.65±96.15 | 0.717 |
| 2 w | 39.92±20.46 | 42.04±27.27 | 0.864 |
| 4 w | 33.71±18 | 37.53±18.61 | 0.152 |
| 6 w | 34.94±19.17 | 41.00±25.8 | 0.231 |
| 8 w | 38.72±25.12 | 38.77±17.97 | 0.327 |
| Fat (g) |  |  |  |
| 0 w | 32.32±23.6 | 32.3±31.4 | 0.593 |
| 2 w | 33.3±21.41 | 31.7±21.49 | 0.584 |
| 4 w | 27.25±15.69 | 30.24±19.34 | 0.482 |
| 6 w | 30.98±23.39 | 33.25±23.75 | 0.591 |
| 8 w | 32.5±24.36 | 38.78±27.71 | 0.178 |
| Fiber (g) |  |  |  |
| 0 w | 5.00±6.05 | 7.68±12.09 | 0.134 |
| 2 w | 4.50±4.06 | 5.17±4.55 | 0.303 |
| 4 w | 5.71±10.00 | 5.27±9.37 | 0.509 |
| 6 w | 4.12±4.66 | 4.18±4.35 | 0.654 |
| 8 w | 4.96±4.96 | 4.09±3.51 | 0.646 |
| Carbohydrate (g) |  |  |  |
| 0 w | 99.73±49.63 | 117.72±187.97 | 0.804 |
| 2 w | 100.33±50.58 | 108.28±46.99 | 0.179 |
| 4 w | 99.19±46.41 | 107.96±51.42 | 0.402 |
| 6 w | 107.13±45.73 | 111.64±57.61 | 0.984 |
| 8 w | 109.82±76.48 | 111.33±59.2 | 0.635 |

Data are presented as mean±SD.

**Supplementary Table S3. Mixed model.**

| Nutrients | Coefficients (95%CI） | *P* |
| --- | --- | --- |
| Calories |  |  |
| treatment | 51.78 (-23.57 to 127.13) | 0.18 |
| 2 w | -47.38 (-194.83 to 100.07) | 0.53 |
| 4 w | -73.58 (-161.08 to 13.93) | 0.10 |
| 6 w | -93.98 (-175.56 to -12.4) | 0.02 |
| 8 w | -29.8 (-117.12 to 57.51) | 0.50 |
| Protein |  |  |
| treatment | 3.12 (-1.07 to 7.3) | 0.14 |
| 2 w | 27.05 (12.67 to 41.42) | 0.01 |
| 4 w | 2.26 (-2.58 to 7.1) | 0.36 |
| 6 w | -3.09 (-7.23 to 1.05) | 0.14 |
| 8 w | -0.72 (-5.26 to 3.82) | 0.76 |
| Fat |  |  |
| treatment | -0.72 (-5.26 to 3.82) | 0.29 |
| 2 w | 1.99 (-1.68 to 5.66) | 0.26 |
| 4 w | -3.39 (-9.32 to 2.54) | 0.24 |
| 6 w | -3.11 (-8.3 to 2.08) | 0.01 |
| 8 w | -6.92 (-11.72 to -2.13) | 0.19 |
| Fiber |  |  |
| treatment | 0.07 (-0.83 to 0.97) | 0.87 |
| 2 w | 1.84 (0.17 to 3.52) | 0.03 |
| 4 w | 0.32 (-0.57 to 1.21) | 0.47 |
| 6 w | 0.97 (-0.67 to 2.6) | 0.24 |
| 8 w | -0.37 (-1.29 to 0.56) | 0.43 |
| Carbohydrate |  |  |
| treatment | 6.65 (-3.27 to 16.58) | 0.19 |
| 2 w | -1.69 (-26.26 to 22.88) | 0.89 |
| 4 w | -6.21 (-18.95 to 6.54) | 0.34 |
| 6 w | -6.93 (-19.38 to 5.53) | 0.27 |
| 8 w | -1.16 (-13.86 to 11.54) | 0.86 |

Results of mixed models looking at the data longitudinally.

**Supplementary Table S4. Efficacy of H. pylori eradication in the two groups.**

| Analysis Placebo (n=74) Probiotics (n=77) *P* | | | |
| --- | --- | --- | --- |
| PP | 61/72 (84.72%) | 67/75 (89.33%) | 0.226 |
| ITT | 61/74 (82.43%) | 67/77 (87.01%) | 0.405 |

ITT, intention to treat; PP, per protocol; Data are presented as n (%).

| Institutional Review Boards | | |
| --- | --- | --- |
| 1 | Xinqiao Hospital, Third Military Medical University | master ethics committee |
| 2 | Chongqing Iron and Steel General Hospital |  |
| 3 | Nanchuan People’s Hospital |  |
| 4 | 958 Hospital of PLA |  |
| 5 | Chongqing Fifth People’s Hospital |  |
| 6 | Affiliated Hospital of North Sichuan Medical College |  |
| 7 | Affiliated Hospital of Chengdu Medical College |  |
